# Supplementary material for: Synthesis and processing technique to reduce the particle size of ZnO pellet by hybrid vibrational annealing and dry quenching set up
Source: Research Square preprint supplement (doi:10.21203/rs.3.rs-1252822/v1), 2022-02-01
Supplement: Supplementary file 1 [file 48601e9e8fb8d17811d0e6ef.docx]

**List of Figures**

**Scheme 1**Schematic diagram of thermo-vibrational annealing attached with vibrational dry quenching setup

**Figure 1**XRD patterns of annealed pellets **a**ZWOV and ZWV samples **b** Zoomed in version of (101) peak

**Figure 2** W-H plot ofZnO pellets **a**ZWOV and **b** ZWV annealed at 8000C

**Figure 3** SEM micrographs and corresponding grain diameter size distribution histograms of annealed ZWOV and ZWV pellets

**Figure 4** Energy dispersive spectra of annealed ZnO pellets **a**ZWOV and **b**ZWV

**Fig.5**TEM images and corresponding particle size distribution histograms of ZNPs annealed at 8000C**a**ZWOV**b** ZWV

**Fig. 6** FTIR Spectra of both ZWOV and ZWV annealed pellets

**Fig.7** UV-Visible spectra with Tauc’s plot(inset) of **a** ZWOV **b** ZWV samples

**Fig.8** Raman spectrum of ZWOV and ZWV pellets
