# Supplementary material for: Synthesis and processing technique to reduce the particle size of ZnO pellet by hybrid vibrational annealing and dry quenching set up
Source: Research Square preprint supplement (doi:10.21203/rs.3.rs-1252822/v1), 2022-02-01
Supplement: Supplementary file 2 [file 4f0843b30e89bbc22558bfc3.doc]

**Novelty of this research article**

The main objective of this paper is to reduce the particle as well as grain size of ZnO during annealing by using a simple and low-cost processing device, i.e., “hybrid vibrational annealing and dry quenching setup”, which is designed indigenously. Here, mechanical vibrational energy was applied to the sample during annealing as well as dry-quenching to restrict grain growth. Even though many researchers were worked on ZnO nanostructures, no work is still reported on particle size reduction of oxide semiconducting materials during heat treatment process. By using such a novel technique, we were able to reduce the particle size of ZnO to nano-range as compared to that annealed without vibration. Reduction in particle as well as grain size of ZnO leads to increase in its surface-to-volume ratio and surface-active sites, which make it as a suitable candidate for application in different electrical, optical and mainly in sensing devices.
