# Supplementary material for: Synthesis and processing technique to reduce the particle size of ZnO pellet by hybrid vibrational annealing and dry quenching set up
Source: Research Square preprint supplement (doi:10.21203/rs.3.rs-1252822/v1), 2022-02-01
Supplement: Supplementary file 4 [file b6e92a1ceb50e9a748e7ade3.docx]

**List of Tables**

**Table 1** Estimation of average crystallite size from different intense peaks of ZWOV and ZWV pellets

**Table 2** List of calculated values of lattice parameters (‘’ and ‘’) and interplanar spacing in ZWOV and ZWV

**Table 3** Calculated Structural parameters from XRD patterns of ZWOV and ZWV pellets

**Table 4** Elemental constituents’ analysis of ZWOV and ZWV pellets
