# Supplementary material for: Synthesis and processing technique to reduce the particle size of ZnO pellet by hybrid vibrational annealing and dry quenching set up
Source: Research Square preprint supplement (doi:10.21203/rs.3.rs-1252822/v1), 2022-02-01
Supplement: Supplementary file 6 [file 034157d27d49e53df46f6a93.docx]

Conflicts of Interest Statement

# Manuscript title:

**Synthesis and processing technique to reduce the particle size of ZnO pellet by hybrid vibrational annealing and dry quenching set up**

The authors whose names are listed immediately below certify that they have NO affiliations with or involvement in any organization or entity with any financial interest (such as honoraria; educational grants; participation in speakers’ bureaus; membership, employment, consultancies, stock ownership, or other equity interest; and expert testimony or patent-licensing arrangements), or non-financial interest (such as personal or professional relationships, affiliations, knowledge or beliefs) in the subject matter or materials discussed in this manuscript.

# Author names:

**This statement is signed by all the authors to indicate agreement that the above information is true and correct** (*a photocopy of this form may be used if there are more than 10 authors*):

| **Author'sname(typed)** | **Author's signature** | **Date** |
| --- | --- | --- |
| Nirlipta Kar | 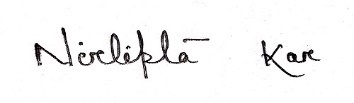 | 12.01.2022 |
| Sushanta Kumar Kamilla | 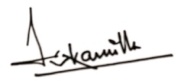 | 12.01.2022 |
