# Supplementary figures and images for: Synthesis and processing technique to reduce the particle size of ZnO pellet by hybrid vibrational annealing and dry quenching set up
Source: Research Square preprint supplement (doi:10.21203/rs.3.rs-1252822/v1), 2022-02-01

**GRAPHYCAL ABSTRACT**


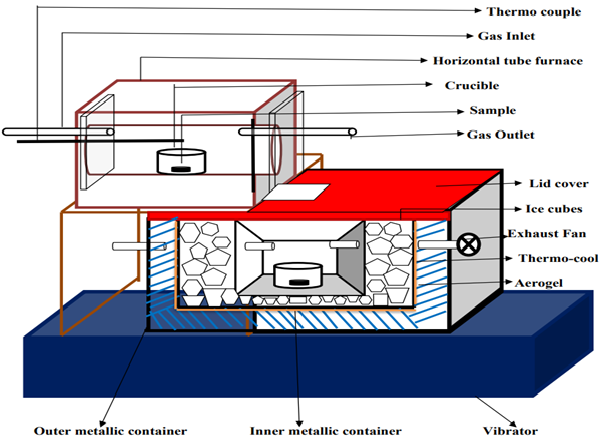


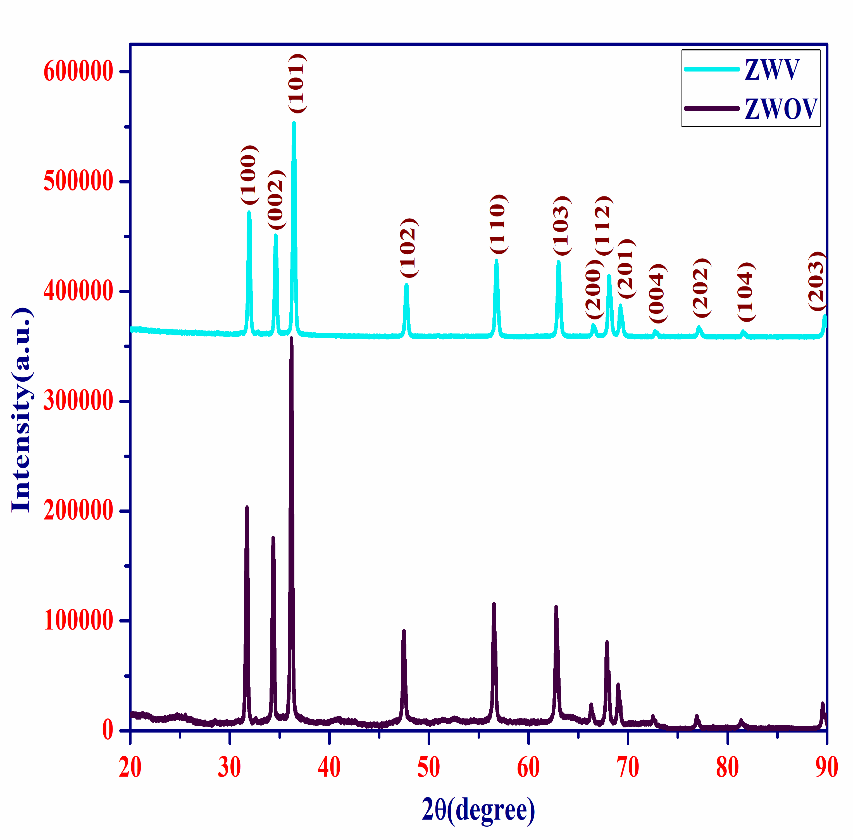

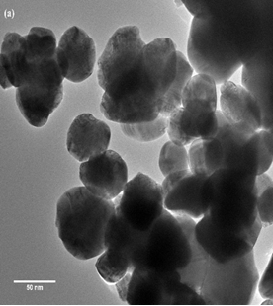

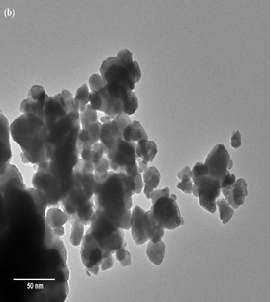

Supplement: Supplementary file 5 [file f7ff3d16efdb376ace5672c0.docx]
